# Supplementary material
Source: PubMed Central journal article supplement (PMC8627489)

a

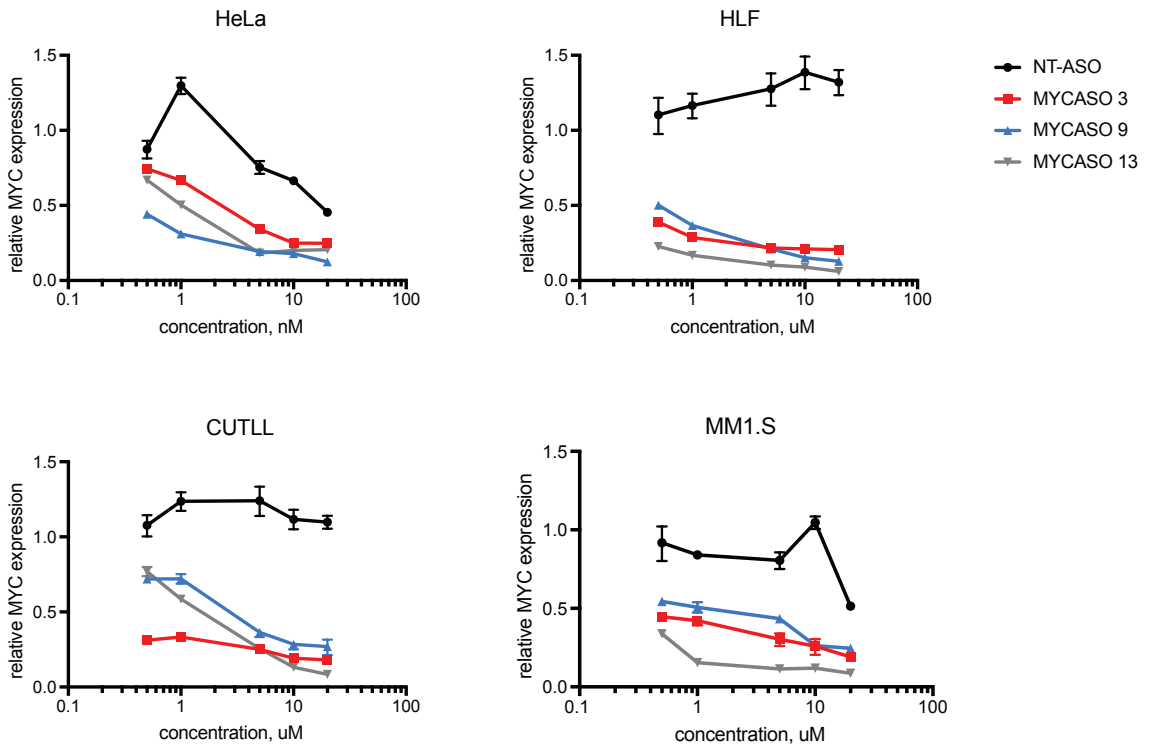

b

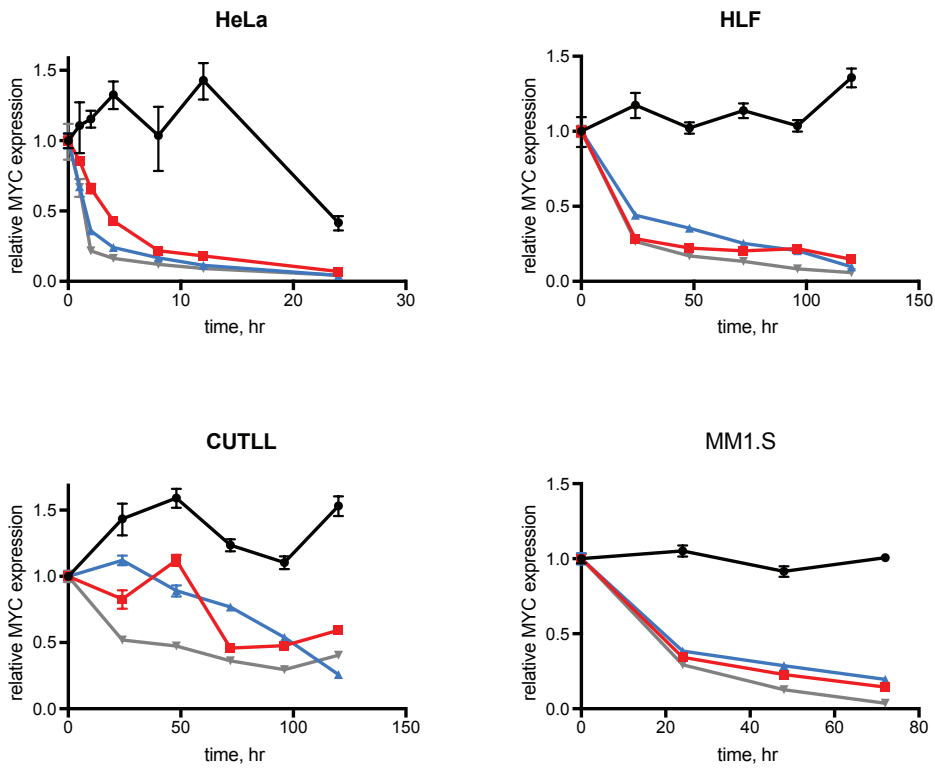

Supplemental Figure 1

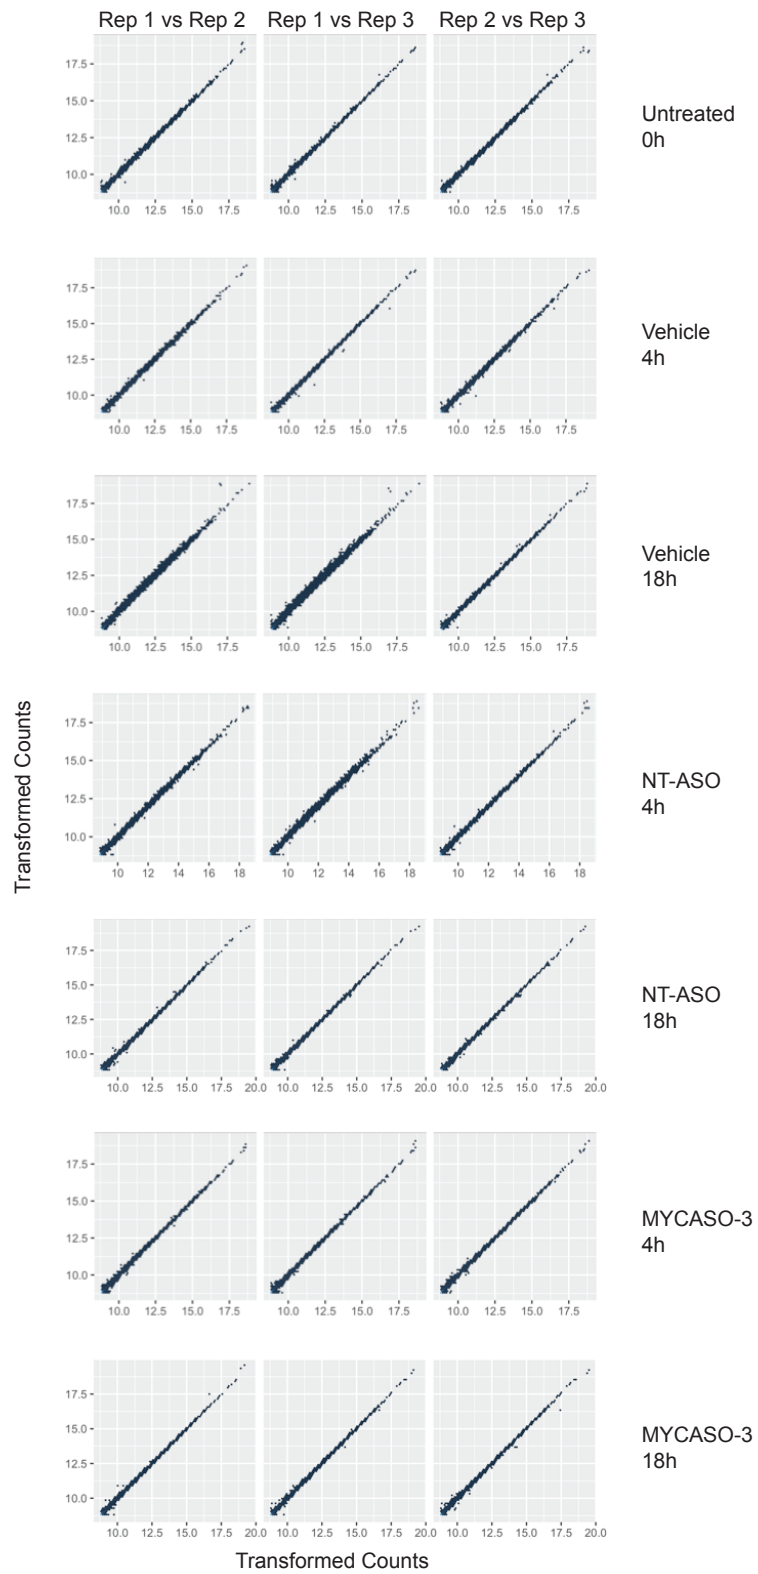

Supplemental Figure 2

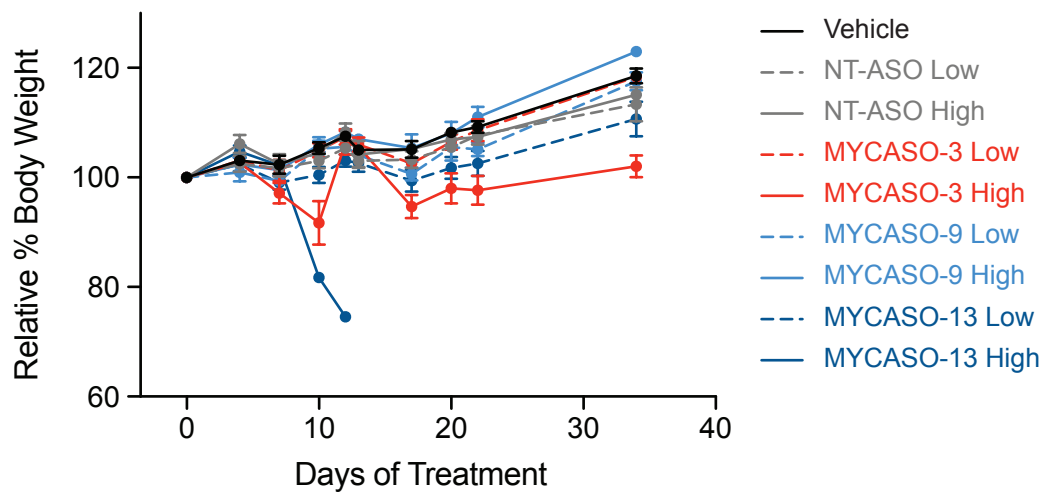

Supplemental Figure 3

Supplement: NIHMS1745052-supplement-Supplemental_Figures.pdf [file NIHMS1745052-supplement-Supplemental_Figures.pdf]
